# Supplementary material for: FLT3 inhibitors potentially improve response rates in acute myeloid leukemia harboring t(6;9)(DEK::NUP214): the Mayo Clinic experience
Source: PubMed Central journal article supplement — Haematologica. 2024 Jun 20;109(11):3785–9. doi: 10.3324/haematol.2024.285359 (PMC11532714; doi:10.3324/haematol.2024.285359), 2024-06-20
Supplement: 2024_285359_CSIZMAR_SUPPL.pdf [file 2024_285359_CSIZMAR_SUPPL.pdf]

# FLT3 inhibitors potentially improve response rates in acute myeloid leukemia harboring t(6;9)(*DEK::NUP214*): the Mayo Clinic experience

## Authors

---

Clifford M. Csizmar,<sup>1</sup> Antoine N. Saliba,<sup>1</sup> Patricia T. Greipp,<sup>2</sup> Hassan Alkhateeb,<sup>1</sup> Kebede H. Begna,<sup>1</sup> James M. Foran,<sup>3</sup> Naseema Gangat,<sup>1</sup> William J. Hogan,<sup>1</sup> C. Christopher Hook,<sup>1</sup> Mark R. Litzow,<sup>1</sup> Abhishek A. Mangaonkar,<sup>1</sup> Jeanne M. Palmer,<sup>4</sup> Animesh Pardhanani,<sup>1</sup> Mithun V. Shah,<sup>1</sup> Ayalew Tefferi,<sup>1</sup> Mehrdad Hefazi Torghabeh,<sup>1</sup> Alexandra P. Wolanskyj-Spinner,<sup>1</sup> Mrinal M. Patnaik,<sup>1</sup> Scott H Kaufmann<sup>1,5</sup> and Aref Al-Kali<sup>1</sup>

<sup>1</sup>Division of Hematology, Department of Medicine, Mayo Clinic, Rochester, MN; <sup>2</sup>Division of Hematopathology, Department of Laboratory Medicine and Pathology, Mayo Clinic, Rochester, MN; <sup>3</sup>Division of Hematology and Medical Oncology, Department of Medicine, Mayo Clinic, Jacksonville, FL; <sup>4</sup>Division of Hematology and Medical Oncology, Department of Medicine, Mayo Clinic, Phoenix, AZ and <sup>5</sup>Division of Oncology Research, Department of Oncology, Mayo Clinic, Rochester, MN, USA

Correspondence:

A. AL-KALI - [alkali.aref@mayo.edu](mailto:alkali.aref@mayo.edu)

S.H. KAUFMANN - [kaufmann.scott@mayo.edu](mailto:kaufmann.scott@mayo.edu)

<https://doi.org/10.3324/haematol.2024.285359>

*Supplemental Data for:*

**FLT3 inhibitors potentially improve response rates in acute myeloid leukemia harboring t(6;9)(DEK::NUP214): The Mayo Clinic experience**

Csizmar CM, *et al.*

**Table of Contents**

|                                                                                      |   |
|--------------------------------------------------------------------------------------|---|
| Figure S1. Mutation profile and MRD assessment of evaluable cases of t(6;9) AML..... | 1 |
| Table S1. Overview of t(6;9) AML patient treatment and outcomes by case.....         | 3 |
| Table S2. Demographics of the comparison cohort.....                                 | 5 |

**A. Mutation Profile of t(6;9) AML Cases**

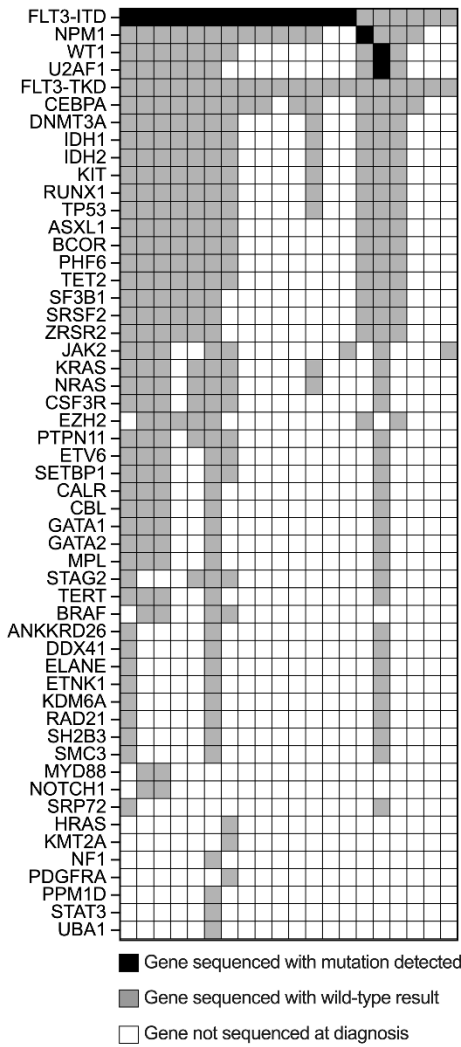

**B. FLT3-ITD Quantitation**

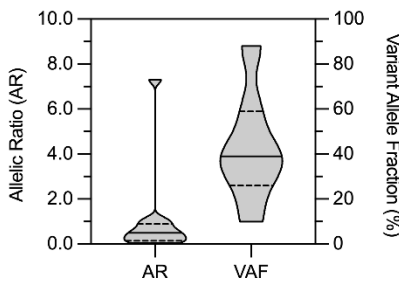

**C. MRD Assessments by MFC & FISH for the Entire Cohort**

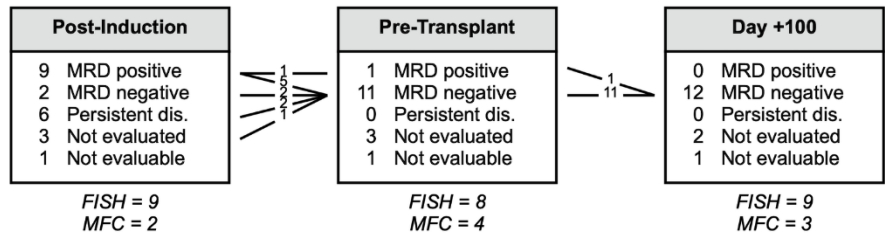

**D. MRD Assessments by MFC Only**

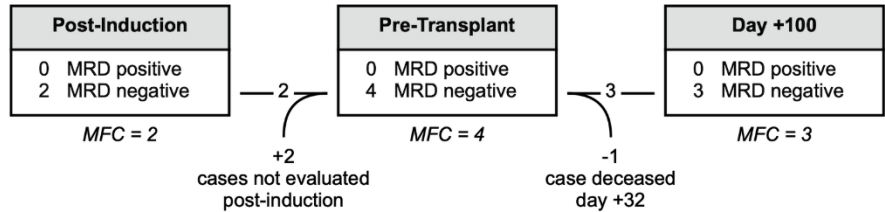

**E. OS by MRD Status after Induction**

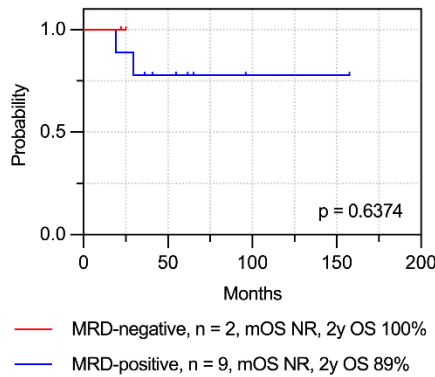

**F. OS by MRD Status Prior to HCT**

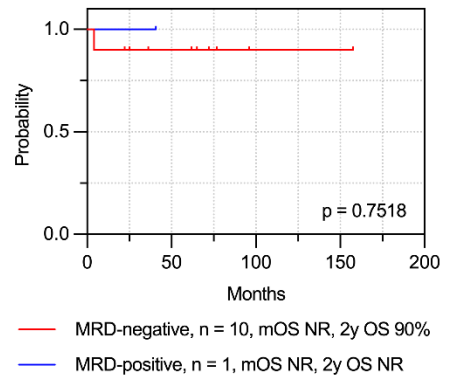

**G. OS by Best Achieved MRD Status**

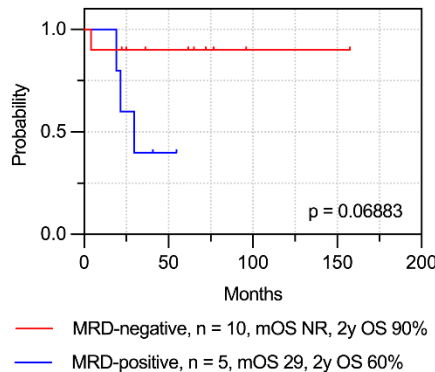

**H. OS of Patients who were MRD+ by MFC**

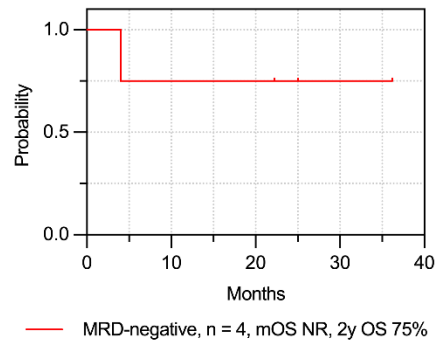

**Figure 1. Mutation Profile and MRD Assessment of Evaluable Cases of t(6;9) AML. (A)** Of the 21 patients identified retrospectively, 20 had evaluable mutation sequencing at the time of diagnosis or referral. Each column depicts a single case. Black cells represent detected mutations, gray cells represent sequenced genes with wild type results, and white cells represent genes for which sequencing data from the time of diagnosis were unavailable. The number (frequency) of detected mutations was 14 (70%) for *FLT3-ITD*, 1 (6%) for *NPM1*, 1

(11%) for *U2AF1*, and 1 for (10%) *WT1*. **(B)** Of n = 13 evaluable cases, the median *FLT3*-ITD allelic ratio was 0.5 (range 0.05 – 7.3) at the time of diagnosis or presentation. Of n = 7 cases where next generation sequencing (NGS) was available, the median *FLT3*-ITD variant allele fraction (VAF) was 39% (range 10 – 88%). In both violin plots, the solid bars depict the median while dashed bars depict the upper and lower quartiles. **(C)** MRD was assessed by either multiparameter flow cytometry (MFC) or fluorescence *in situ* hybridization (FISH) of at least 500 nuclei at three time points: within 60 days of induction, prior to allogeneic hematopoietic cell transplantation (alloHCT), or on post-HCT day +100. **(D)** The small group (n = 4) of patients whose MRD status was assessed by contemporary methods only (i.e., MFC). Kaplan-Meier plots depict the median OS (mOS) of patients stratified by MRD status **(E)** after induction therapy, **(F)** prior to alloHCT, **(G)** the best MRD status achieved at any time, or **(H)** as assessed by contemporary MFC. In most subgroups, mOS was not reached (NR); otherwise, mOS is depicted in months. No survival comparisons are statistically significant.

**Table S1. Overview of t(6;9) AML Patient Treatment and Outcomes by Case**

| Age / Gender | Sequential Lines of Treatment                                                                                                                         | HCT Parameters                    | Best Response | Status at Last Follow Up | Cause of Death                            |
|--------------|-------------------------------------------------------------------------------------------------------------------------------------------------------|-----------------------------------|---------------|--------------------------|-------------------------------------------|
| 46 F         | Cytarabine + idarubicin<br>HiDAC consolidation<br>Allogeneic HCT                                                                                      | MRD<br>Bu/Cy<br>PBSCT             | CR            | Deceased                 | Mesenteric thrombosis with bowel necrosis |
| 19 F         | Cytarabine + daunorubicin + midostaurin<br>HiDAC + midostaurin consolidation<br>Allogeneic HCT                                                        | Haplo<br>Flu/Bu/Thiotepa<br>PBSCT | CR            | Alive                    |                                           |
| 42 M         | Cytarabine + daunorubicin<br>HiDAC consolidation<br>Allogeneic HCT                                                                                    | MRD<br>Bu/Cy<br>BMT               | CR            | Alive                    |                                           |
| 67 M         | Venetoclax + azacitidine + gilteritinib                                                                                                               |                                   | NR            | Deceased                 | r/r AML                                   |
| 42 M         | Cytarabine + daunorubicin + midostaurin<br>HiDAC + midostaurin<br>Allogeneic HCT                                                                      | MRD<br>Bu/Flu<br>PBSCT            | CR            | Alive                    |                                           |
| 20 F         | Cytarabine + idarubicin (7+3) x2<br>HiDAC consolidation<br>Allogeneic HCT                                                                             | mMUD<br>Flu/Cy/TBI<br>DUCBT       | CR            | Alive                    |                                           |
| 27 F         | Cytarabine + idarubicin x2<br>MEC salvage<br>FLT3i trial (AC220)<br>Azacitidine<br>Decitabine + sorafenib<br>Quizartinib<br>Crenolanib<br>Hydroxyurea |                                   | NR            | Deceased                 | r/r AML                                   |
| 32 F         | Cytarabine + daunorubicin x2<br>Allogeneic HCT                                                                                                        | MUD<br>Bu/Cy<br>PBSCT             | CR            | Alive                    |                                           |
| 54 F         | Cytarabine + daunorubicin + midostaurin<br>HiDAC + midostaurin consolidation<br>Allogeneic HCT                                                        | MUD<br>Bu/Flu<br>PBSCT            | CR            | Alive                    |                                           |
| 39 M         | Cytarabine + idarubicin<br>HiDAC consolidation<br>Allogeneic HCT<br>CLAG-M                                                                            | MRD<br>Bu/Flu<br>PBSCT            |               | Deceased                 | r/r AML                                   |
| 57 M         | Azacitidine<br>Cytarabine + idarubicin<br>HiDAC consolidation<br>FLT3i trial (AC220)                                                                  |                                   | CRh           | Deceased                 | r/r AML                                   |
| 52 F         | Cytarabine + idarubicin<br>HiDAC consolidation<br>Allogeneic HCT                                                                                      | MUD<br>Bu/Cy<br>PBSCT             | CR            | Alive                    |                                           |

|      |                                                                                                                                                                                                                                         |                           |     |          |                                                                      |
|------|-----------------------------------------------------------------------------------------------------------------------------------------------------------------------------------------------------------------------------------------|---------------------------|-----|----------|----------------------------------------------------------------------|
| 60 F | Cytarabine + idarubicin<br>CLAG-M salvage<br>HiDAC consolidation<br>Anti-CD47 antibody trial (TT1-621)                                                                                                                                  |                           | CRi | Deceased | r/r AML                                                              |
| 63 M | Cytarabine + daunorubicin<br>HiDAC consolidation<br>Allogeneic HCT                                                                                                                                                                      | MUD<br>Flu/Mel<br>PBSCT   | CR  | Alive    |                                                                      |
| 41 F | Cytarabine + anthracycline x2<br>CLAG-M salvage<br>Allogeneic HCT                                                                                                                                                                       | MUD<br>Flu/Mel<br>PBSCT   | CR  | Alive    |                                                                      |
| 29 M | Cytarabine + idarubicin<br>HiDAC salvage<br>HiDAC consolidation<br>Allogeneic HCT                                                                                                                                                       | MUD<br>Bu/Flu<br>PBSCT    | CR  | Alive    |                                                                      |
| 39 M | Cytarabine + idarubicin<br>MEC salvage<br>Allogeneic HCT                                                                                                                                                                                | Haplo<br>Bu/Flu<br>PBSCT  | CR  | Alive    |                                                                      |
| 36 F | Cytarabine + daunorubicin + midostaurin<br>HiDAC consolidation<br>Allogeneic HCT                                                                                                                                                        | MUD<br>Bu/Cy<br>PBSCT     | CR  | Alive    |                                                                      |
| 23 M | Cytarabine + idarubicin + etoposide<br>ADE + midostaurin consolidation<br>Allogeneic HCT                                                                                                                                                | Haplo<br>Flu/TBI<br>PBSCT | CRh | Deceased | Post-transplant SOS<br>with multiorgan failure<br>(deceased day +32) |
| 19 F | Cytarabine + daunorubicin + midostaurin + GO<br>HiDAC + midostaurin consolidation<br>Allogeneic HCT<br>Gilteritinib maintenance                                                                                                         | Haplo<br>Flu/TBI<br>PBSCT | CR  | Alive    |                                                                      |
| 16 F | Cytarabine + idarubicin<br>Venetoclax + azacitidine<br>FLAG-Ida<br>Decitabine + vorinostat-FLAG<br>Venetoclax + gilteritinib + daratumumab<br>Mitoxantrone + etoposide + GO<br>Vyxeos + decitabine + vorinostat<br>Imatinib + sirolimus |                           | NR  | Deceased | r/r AML                                                              |

Abbreviations not defined elsewhere: F, female; M, male; ADE, cytarabine, daunorubicin, and etoposide; CLAG-M, cladribine, cytarabine, granulocyte colony stimulating factor (G-CSF), and mitoxantrone; FLAG-Ida, fludarabine, cytarabine, G-CSF, and idarubicin; GO, gemtuzumab ozogamicin; HiDAC, high-dose cytarabine; MEC, mitoxantrone, etoposide, and cytarabine; MUD, matched unrelated donor; MRD, matched related donor; mMUD, mismatched unrelated donor; Haplo, haploidentical donor; Bu, busulfan; Cy, cyclophosphamide; Flu, fludarabine; Mel, melphalan; TBI, total body irradiation; BMT, bone marrow harvest transplantation; DUCBT, double umbilical cord blood transplantation; PBSCT, peripheral blood stem cell transplantation; NR, no response; r/r, relapsed/refractory; SOS, sinusoidal obstruction syndrome.

**Table S2. Demographics of the Comparison Cohort.**

| Characteristic          | Non-t(6;9) Cohort | ELN Favorable | ELN Intermediate | ELN Adverse  |
|-------------------------|-------------------|---------------|------------------|--------------|
| n                       | 160               | 17            | 61               | 82           |
| <b>Demographics</b>     |                   |               |                  |              |
| Age, years              | 65 (18 – 86)      | 59 (19 – 78)  | 63 (19 – 86)     | 68 (18 – 86) |
| Male                    | 87 (54%)          | 7 (41%)       | 28 (46%)         | 52 (63%)     |
| Female                  | 73 (46%)          | 10 (59%)      | 33 (54%)         | 30 (37%)     |
| <b>Cytogenetics</b>     |                   |               |                  |              |
| Normal karyotype        | 92 (58%)          | 11 (65%)      | 46 (75%)         | 35 (43%)     |
| Complex karyotype       | 23 (14%)          | 0 (0%)        | 0 (0%)           | 23 (28%)     |
| <b>Mutations</b>        |                   |               |                  |              |
| Number of mutated genes | 2 (0 – 7)         | 3 (0 – 5)     | 2 (0 – 6)        | 3 (0 – 7)    |
| <i>ASXL1</i>            | 27 (17%)          | 1 (6%)        | 4 (7%)           | 22 (27%)     |
| <i>BCOR</i>             | 11 (7%)           | 0 (0%)        | 2 (3%)           | 9 (11%)      |
| <i>CALR</i>             | 1 (1%)            | 0 (0%)        | 0 (0%)           | 1 (1%)       |
| <i>CBL</i>              | 4 (3%)            | 0 (0%)        | 2 (3%)           | 2 (2%)       |
| <i>CEBPA</i>            | 8 (5%)            | 1 (6%)        | 2 (3%)           | 5 (6%)       |
| <i>CSF3R</i>            | 2 (1%)            | 0 (0%)        | 1 (2%)           | 1 (1%)       |
| <i>DNMT3A</i>           | 38 (24%)          | 4 (24%)       | 18 (30%)         | 16 (20%)     |
| <i>EZH2</i>             | 6 (4%)            | 0 (0%)        | 0 (0%)           | 6 (7%)       |
| <i>FLT3</i> (Any)       | 28 (18%)          | 5 (29%)       | 17 (28%)         | 6 (7%)       |
| <i>FLT3</i> -ITD        | 23 (14%)          | 2 (12%)       | 16 (26%)         | 5 (6%)       |
| <i>FLT3</i> -TKD        | 6 (4%)            | 3 (18%)       | 1 (2%)           | 2 (2%)       |
| <i>GATA2</i>            | 5 (3%)            | 0 (0%)        | 2 (3%)           | 3 (4%)       |
| <i>IDH1</i>             | 8 (5%)            | 1 (6%)        | 4 (7%)           | 3 (4%)       |
| <i>IDH2</i>             | 26 (16%)          | 4 (24%)       | 9 (15%)          | 13 (16%)     |
| <i>JAK2</i>             | 9 (6%)            | 0 (0%)        | 1 (2%)           | 8 (10%)      |
| <i>KIT</i>              | 6 (4%)            | 1 (6%)        | 4 (7%)           | 1 (1%)       |
| <i>KRAS</i>             | 6 (4%)            | 2 (12%)       | 1 (2%)           | 3 (4%)       |
| <i>MPL</i>              | 2 (1%)            | 0 (0%)        | 1 (2%)           | 1 (1%)       |
| <i>NOTCH1</i>           | 1 (1%)            | 0 (0%)        | 1 (2%)           | 0 (0%)       |
| <i>NPM1</i>             | 19 (12%)          | 12 (71%)      | 6 (10%)          | 1 (1%)       |
| <i>NRAS</i>             | 15 (9%)           | 3 (18%)       | 6 (10%)          | 6 (7%)       |
| <i>PHF6</i>             | 5 (3%)            | 0 (0%)        | 2 (3%)           | 3 (4%)       |
| <i>PTPN11</i>           | 5 (3%)            | 2 (12%)       | 2 (3%)           | 1 (1%)       |
| <i>RUNX1</i>            | 29 (18%)          | 0 (0%)        | 5 (8%)           | 24 (29%)     |
| <i>SETBP1</i>           | 4 (3%)            | 0 (0%)        | 1 (2%)           | 3 (4%)       |
| <i>SF3B1</i>            | 7 (4%)            | 0 (0%)        | 0 (0%)           | 7 (9%)       |
| <i>SRSF2</i>            | 23 (14%)          | 2 (12%)       | 7 (11%)          | 13 (16%)     |
| <i>TET2</i>             | 31 (19%)          | 3 (18%)       | 14 (23%)         | 14 (17%)     |
| <i>TP53</i>             | 29 (18%)          | 0 (0%)        | 0 (0%)           | 29 (35%)     |
| <i>U2AF1</i>            | 15 (9%)           | 1 (6%)        | 3 (5%)           | 11 (13%)     |
| <i>WT1</i>              | 20 (13%)          | 6 (35%)       | 6 (10%)          | 8 (10%)      |
| <i>ZRSR2</i>            | 1 (1%)            | 0 (0%)        | 0 (0%)           | 1 (1%)       |
| <b>Outcomes</b>         |                   |               |                  |              |
| Allogeneic HCT          | 47 (29%)          | 7 (41%)       | 24 (39%)         | 16 (20%)     |
| Death                   | 114 (71%)         | 9 (53%)       | 38 (62%)         | 67 (82%)     |

Data are presented as median (range) or n (%), as appropriate. Abbreviations and units are as defined in the main text.
